# Supplementary material for: Hypothalamic Transcriptome Analysis Reveals the Crucial MicroRNAs and mRNAs Affecting Litter Size in Goats
Source: Front Vet Sci. 2021 Nov 1;8:747100. doi: 10.3389/fvets.2021.747100 (PMC8591166; doi:10.3389/fvets.2021.747100)
Supplement: Supplementary file 14 [file Table_14.XLSX]

## Sheet: upregulated network
miRNA	miRNA_log2FC	Up/Down	mRNA	Gene_name	mRNA_log2FC	Up/Down
Novel_1187	3.6093	Up	XM_005694095.3	gene-AFMID	-2.00166	Down
Novel_1187	3.6093	Up	XM_013964217.2	gene-M6PR	-4.46694	Down
Novel_1187	3.6093	Up	XM_018066775.1	gene-MAP4	-7.23028	Down
Novel_1187	3.6093	Up	XM_018058966.1	gene-SPEG	-8.39162	Down
Novel_1187	3.6093	Up	XM_018066411.1	gene-NTRK3	-22.8717	Down
Novel_1187	3.6093	Up	XM_018046216.1	gene-ZBTB7B	-23.0657	Down
Novel_1187	3.6093	Up	XM_018048999.1	gene-SHANK3	-23.0941	Down
Novel_1187	3.6093	Up	XM_018044337.1	gene-TMEM164	-23.5597	Down
Novel_566	3.2307	Up	XM_018044882.1	gene-FRMD1	-1.35176	Down
Novel_566	3.2307	Up	XM_018044361.1	gene-TPRA1	-3.78159	Down
Novel_566	3.2307	Up	XM_018062596.1	gene-PPP1R13L	-4.27499	Down
Novel_566	3.2307	Up	XM_018055912.1	gene-PKN3	-5.07569	Down
Novel_566	3.2307	Up	XM_018045693.1	gene-SEMA5B	-5.08359	Down
Novel_566	3.2307	Up	XM_018055044.1	gene-RAB11FIP5	-5.4184	Down
Novel_566	3.2307	Up	XM_018039288.1	gene-MDFI	-6.51375	Down
Novel_566	3.2307	Up	XM_018052707.1	gene-TRAF1	-6.71022	Down
Novel_566	3.2307	Up	XM_018043294.1	gene-ERI3	-7.35211	Down
Novel_566	3.2307	Up	XM_018043249.1	gene-ERI3	-7.58696	Down
Novel_566	3.2307	Up	XM_018038560.1	gene-COL11A2	-8.84495	Down
Novel_566	3.2307	Up	XM_005680743.3	gene-CASC1	-9.39044	Down
Novel_566	3.2307	Up	XM_018049801.1	gene-RGS12	-10.4159	Down
Novel_566	3.2307	Up	XM_018043436.1	gene-MYRF	-21.5155	Down
Novel_566	3.2307	Up	XM_018066848.1	gene-IL17RE	-21.6778	Down
Novel_566	3.2307	Up	XM_018054269.1	gene-CGNL1	-21.8297	Down
Novel_566	3.2307	Up	XR_001918069.1	gene-MBD6	-22.1109	Down
Novel_566	3.2307	Up	XM_018055908.1	gene-PKN3	-22.463	Down
Novel_566	3.2307	Up	XM_005680318.3	gene-ZBTB39	-22.7233	Down
Novel_566	3.2307	Up	XM_018066411.1	gene-NTRK3	-22.8717	Down
Novel_566	3.2307	Up	XM_018040189.1	gene-ATXN2L	-23.0074	Down
Novel_566	3.2307	Up	XM_018064435.1	gene-ATP2A3	-23.1189	Down
Novel_566	3.2307	Up	XM_018041552.1	gene-PTPRE	-23.4635	Down
Novel_566	3.2307	Up	XR_001919305.1	gene-FAAP20	-24.0511	Down
Novel_566	3.2307	Up	XM_018057521.1	gene-COL16A1	-24.2318	Down
Novel_566	3.2307	Up	XM_018040761.1	gene-LOC102177581	-24.3485	Down
Novel_566	3.2307	Up	XM_005691547.3	gene-RPH3A	-24.6358	Down
Novel_566	3.2307	Up	XM_018057511.1	gene-COL16A1	-24.755	Down
Novel_604	1.8044	Up	XM_018043157.1	gene-NAV2	-8.46066	Down
Novel_604	1.8044	Up	XR_001918139.1	gene-TTC38	-21.9131	Down
Novel_604	1.8044	Up	XM_018062806.1	gene-CPT1C	-22.6749	Down
Novel_1271	1.7472	Up	XM_018047353.1	gene-ABCC5	-4.13803	Down

## Sheet: downregulated network
miRNA	miRNA_log2FC	Up/Down	mRNA	Gene_name	mRNA_log2FC	Up/Down
Novel_1263	-3.8014	Down	NM_001314283.1	gene-TSC1	1.92366	Up
Novel_389	-1.9701	Down	XM_018046679.1	gene-KMT2C	25.2753	Up
Novel_1266	-1.2468	Down	XM_018042882.1	gene-SF1	7.87543	Up
Novel_1266	-1.2468	Down	XM_018062797.1	gene-IRF3	4.9616	Up
chi-miR-1271-3p	-1.1862	Down	XM_005684651.3	gene-PNISR	4.99484	Up
chi-miR-1271-3p	-1.1862	Down	XM_018039958.1	gene-PIGQ	21.5351	Up
chi-miR-1271-3p	-1.1862	Down	XM_018048460.1	gene-FAM234B	1.50197	Up
chi-miR-1271-3p	-1.1862	Down	XM_018051644.1	gene-MX2	24.9626	Up
chi-miR-1271-3p	-1.1862	Down	XM_018066515.1	gene-ISLR	23.1934	Up
